# Supplementary material
Source: PubMed Central journal article supplement (PMC6685062)

# Selective Depletion and Enrichment of Constituents in “Curcumin” and Other *Curcuma longa* Preparations

J. Brent Friesen,<sup>†,‡</sup> Yang Liu,<sup>†</sup> Shao-Nong Chen,<sup>†</sup> James B. McAlpine,<sup>†,§</sup> and Guido F. Pauli<sup>\*,†,§</sup>

<sup>†</sup> Center for Natural Product Technologies (CENAPT), Program for Collaborative Research in the Pharmaceutical Sciences (PCRPS) and Department of Medicinal Chemistry and Pharmacognosy, College of Pharmacy, University of Illinois at Chicago, Chicago, Illinois 60612, United States

<sup>‡</sup> Department of Physical Sciences, Rosary College of Arts and Sciences, Dominican University, River Forest, Illinois 60305, United States

<sup>§</sup> Institute for Tuberculosis Research, College of Pharmacy, University of Illinois at Chicago, Chicago, Illinois 60612, United States

## ■ SUPPORTING INFORMATION

## ■ TABLE OF CONTENTS

| No. | Content                                                                                                                                                           | Page |
|-----|-------------------------------------------------------------------------------------------------------------------------------------------------------------------|------|
| S1  | NMR Assignments of Curcumin ( <b>1</b> )                                                                                                                          | S-3  |
| S2  | CPC separation of curcuminoid-enriched turmeric extract (CTE).                                                                                                    | S-5  |
| S3  | Volume percentages of individual solvents in the biphasic solvent systems <i>n-hexane</i> /dichloromethane/methanol/water.                                        | S-6  |
| S4  | The <sup>1</sup> H iterative full spin analysis (HiFSA) profiles of curcumin ( <b>1</b> ), demethoxycurcumin ( <b>2</b> ), and bisdemethoxycurcumin ( <b>3</b> ). | S-7  |
| S5  | <sup>1</sup> H NMR spectra of DESIGNER fractions with regions of interest (i – vii).                                                                              | S-8  |

**Figure S1.** NMR Assignments of Curcumin (1) (400/100 MHz, DMSO-*d*<sub>6</sub>)

1D <sup>1</sup>H NMR Spectrum ([Curcuminoids C1386 QHNMR analysis](#))

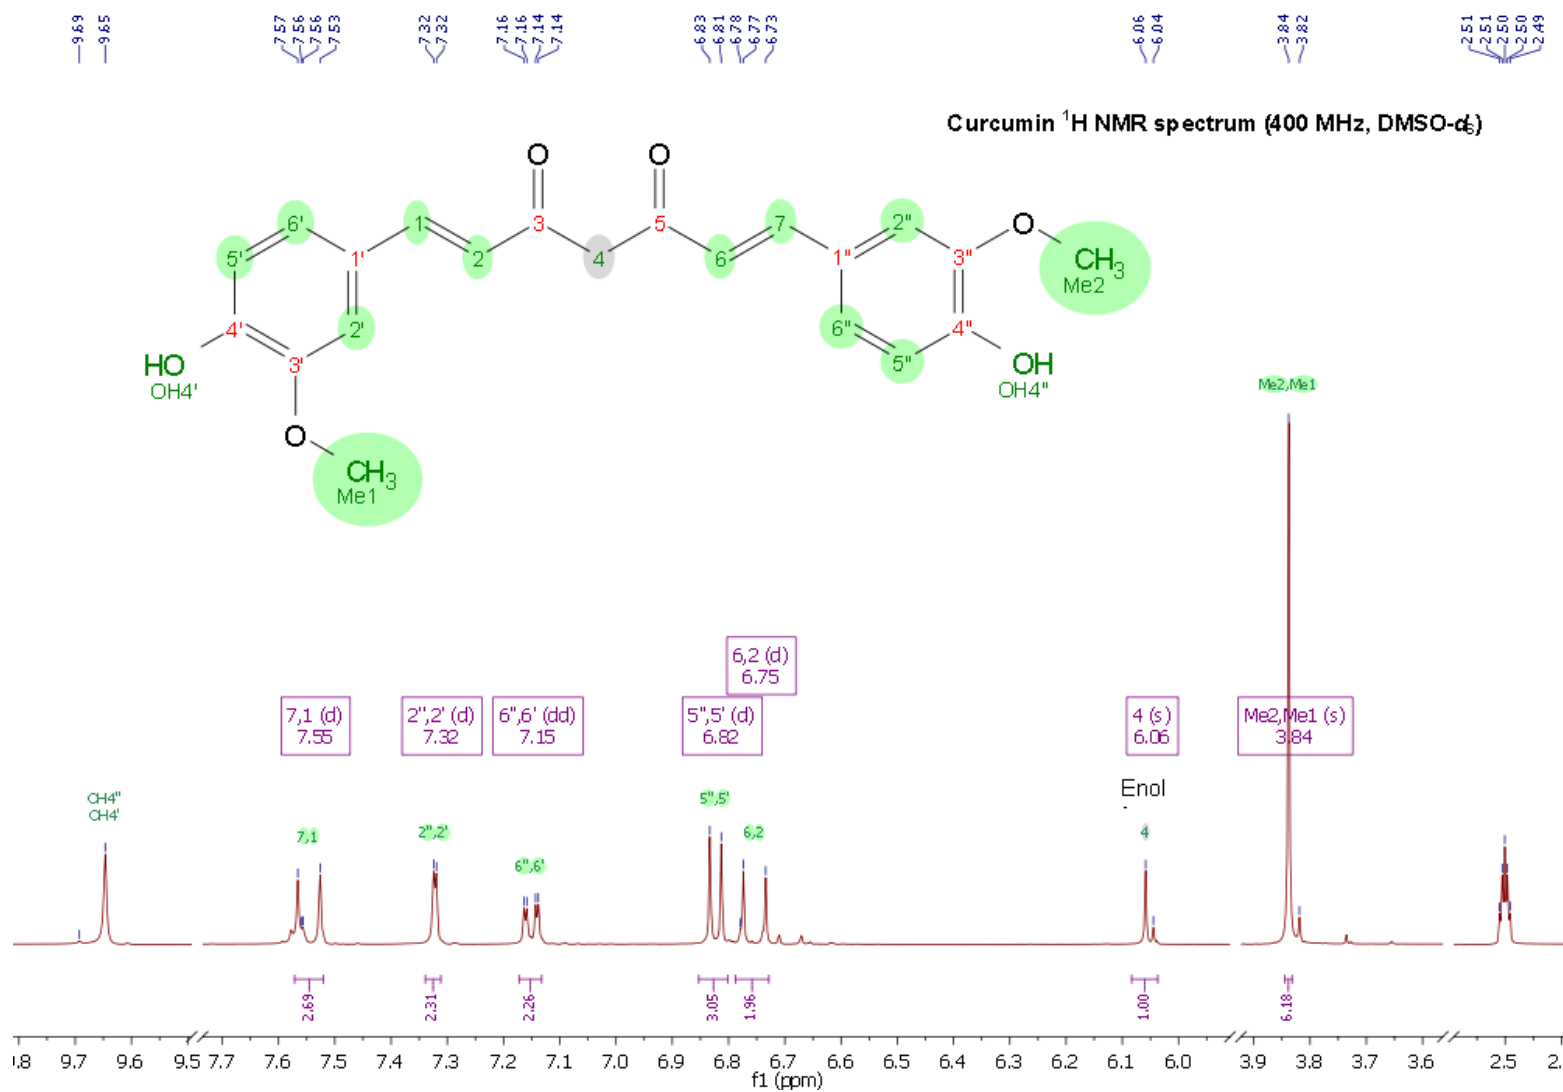

# 1D <sup>13</sup>C NMR Spectrum

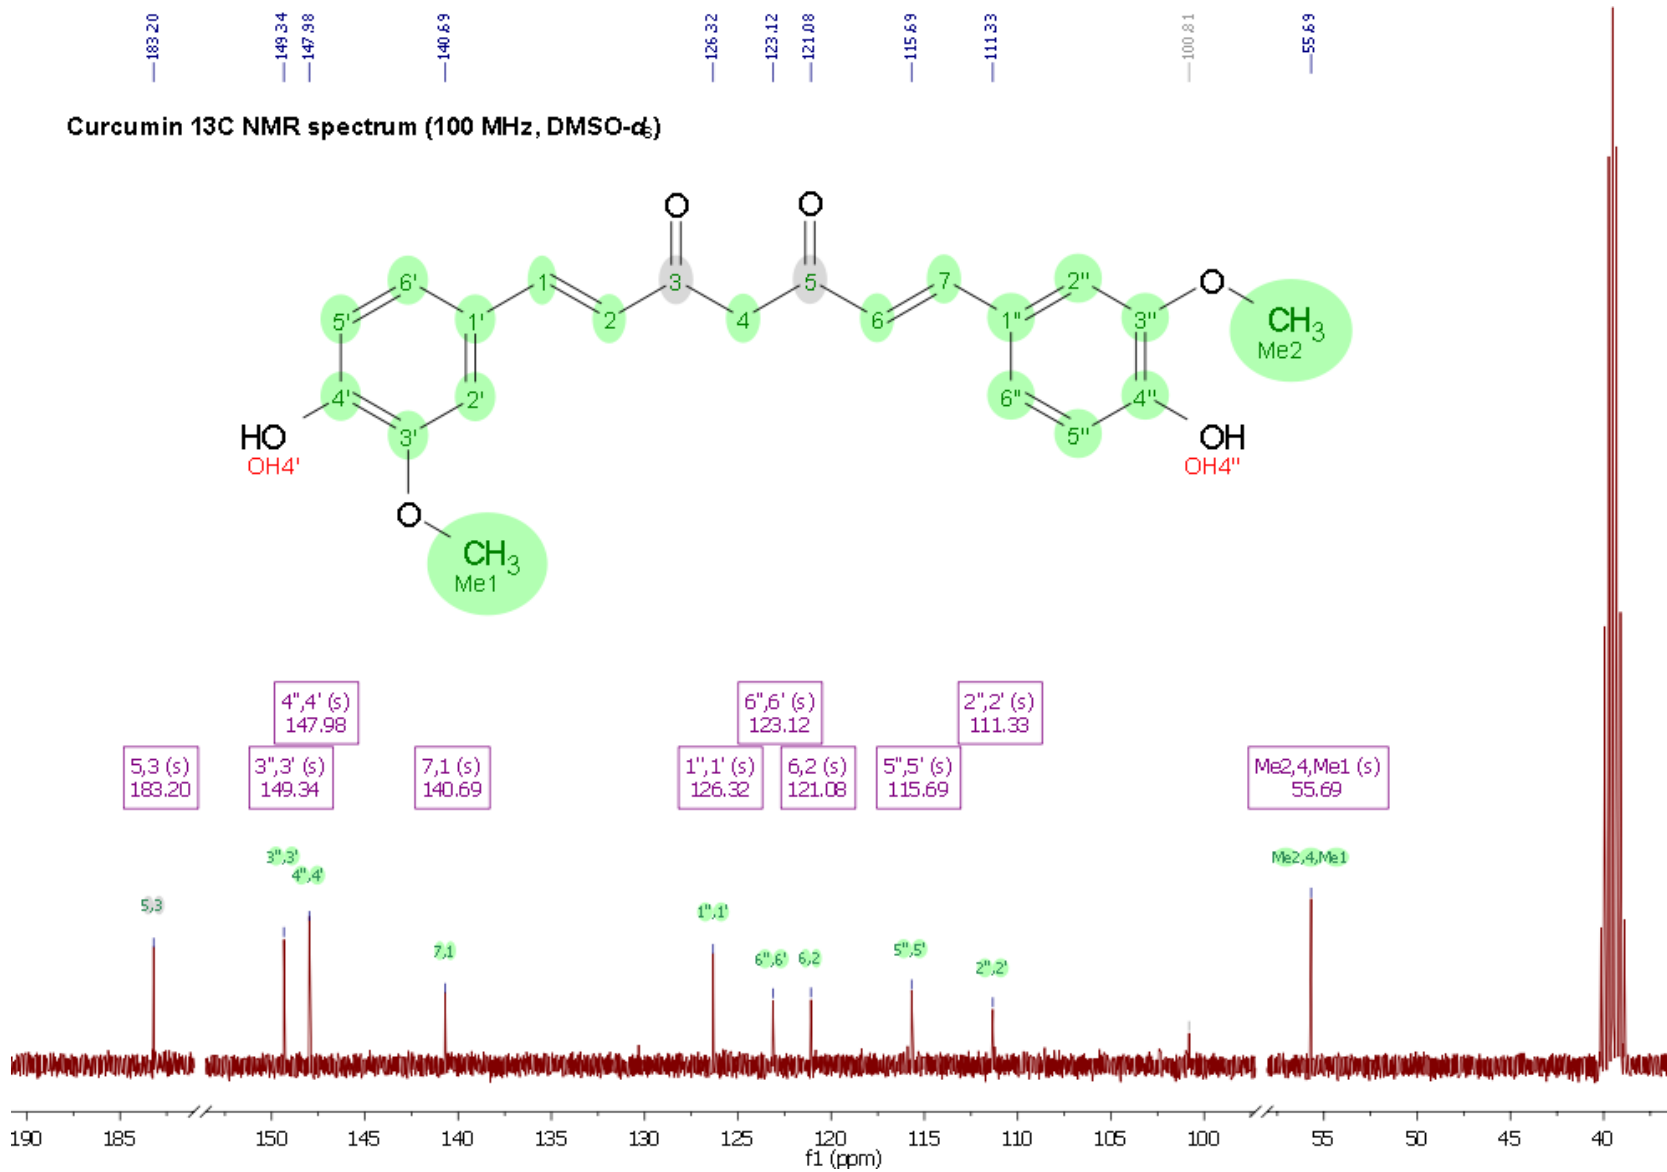

**Figure S2.** CPC separation of curcuminoid-enriched turmeric extract (CTE). Column volume 266 mL, flow rate 10 ml/min, rotation speed 3000 rpm, sample size 360 mg in 8 mL lower phase and 1 mL DMSO;  $S_f = 0.37$ .

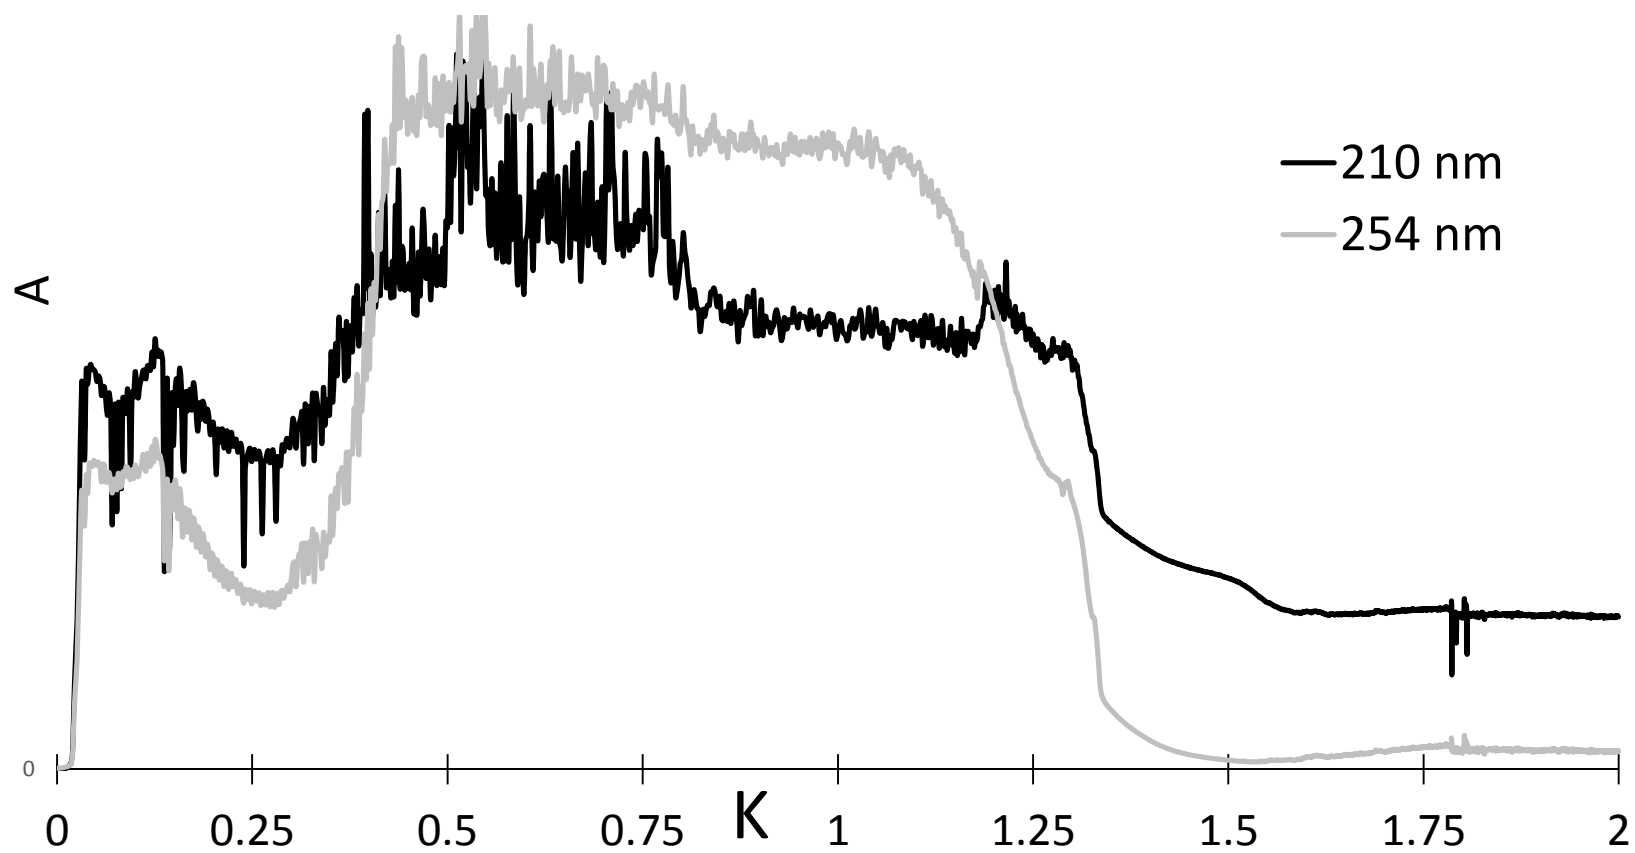

**Figure S3** Volume percentages of individual solvents in the biphasic solvent systems *n*-hexane/dichloromethane/methanol/water.

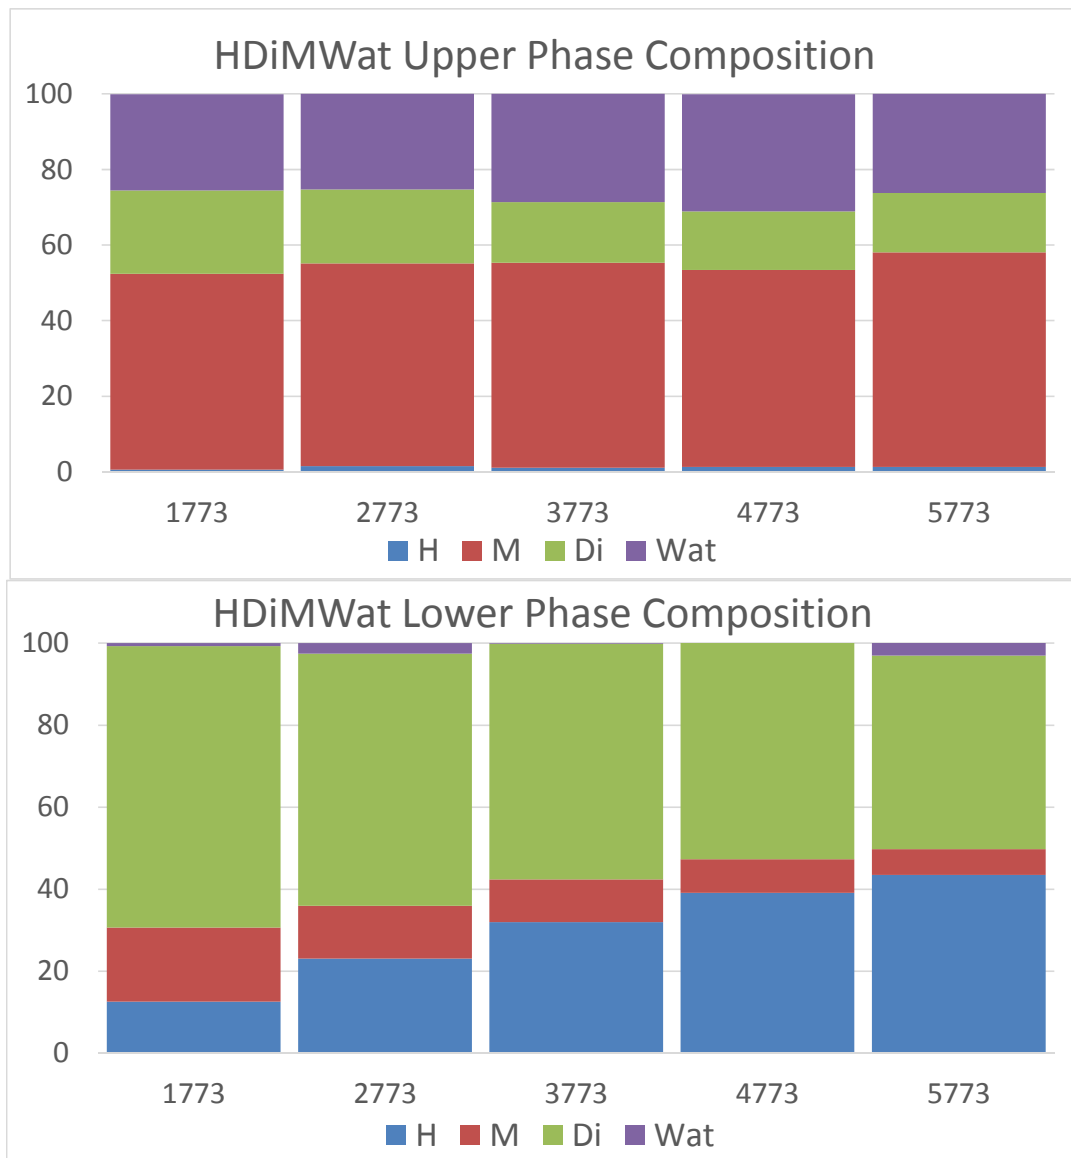

**Table S4** The <sup>1</sup>H iterative full spin analysis (HiFSA) profiles of curcumin (**1**), demethoxycurcumin (**2**), and bisdemethoxycurcumin (**3**). These parameters (shown in perch.pms format) were subsequently for quantitation of the curcuminoid mixtures.

ACTIVE SPECIES:1H

CHEMICAL SHIFTS(PPM):

1-CRCMN 2\*SPIN= 1 SPECIES=1H POPULATION(Y)= 0.44165

1-H1 /1 7.546789 1\*2\*1 STAT=Y PRED= 7.222 RANGE= 0.503 WIDTH(Y)= 2.304 RESP(Y)= 1.0000 HSQC= C1  
 1-H2 /1 6.758370 1\*2\*1 STAT=Y PRED= 6.648 RANGE= 0.818 WIDTH(Y)= 3.108 RESP(Y)= 1.0000 HSQC= C2  
 1-H4 /1 6.054990 1\*1\*1 STAT=Y PRED= 8.037 RANGE= 0.148 WIDTH(Y)= 2.114 RESP(Y)= 1.0000 HSQC= C4  
 1-H2' /1 7.320665 2\*1\*1 STAT=Y PRED= 7.113 RANGE= 0.148 WIDTH(Y)= 1.740 RESP(Y)= 1.0000 HSQC= C2'  
 1-H5' /1 6.821404 2\*1\*1 STAT=Y PRED= 6.815 RANGE= 0.158 WIDTH(Y)= 1.972 RESP(Y)= 1.0000 HSQC= C5'  
 1-H6' /1 7.148632 2\*1\*1 STAT=Y PRED= 6.907 RANGE= 0.178 WIDTH(Y)= 1.444 RESP(Y)= 1.0000 HSQC= C6'  
 1-H-Meth/1 3.836602 2\*1\*3 STAT=Y PRED= 3.901 RANGE= 0.148 WIDTH(Y)= 0.934 RESP(Y)= 1.0000 HSQC= Methyl

2-DMCRCMN 2\*SPIN= 1 SPECIES=1H POPULATION(Y)= 0.45820

2-H1A /2 7.539958 1\*1\*1 STAT=Y PRED= 7.241 RANGE= 0.503 WIDTH(Y)= 1.465 RESP(Y)= 1.0000 HSQC= C1A  
 2-H7A /2 7.545639 1\*1\*1 STAT=Y PRED= 7.236 RANGE= 0.508 WIDTH(Y)= 1.449 RESP(Y)= 1.0000 HSQC= C7A  
 2-H2A /2 6.753371 1\*1\*1 STAT=Y PRED= 6.626 RANGE= 0.818 WIDTH(Y)= 1.419 RESP(Y)= 1.0000 HSQC= C2A  
 2-H6A /2 6.689520 1\*1\*1 STAT=Y PRED= 6.638 RANGE= 0.803 WIDTH(Y)= 1.704 RESP(Y)= 1.0000 HSQC= C6A  
 2-H4A /2 6.040646 1\*1\*1 STAT=Y PRED= 6.000 RANGE= 0.148 WIDTH(Y)= 1.763 RESP(Y)= 1.0000 HSQC= C4A  
 2-H2' /2 7.321283 1\*1\*1 STAT=Y PRED= 7.285 RANGE= 0.183 WIDTH(Y)= 1.390 RESP(Y)= 1.0000 HSQC= C2'  
 2-H6' /2 7.141612 1\*1\*1 STAT=Y PRED= 7.060 RANGE= 0.148 WIDTH(Y)= 3.585 RESP(Y)= 1.0000 HSQC= C6'  
 2-H5' /2 6.818111 1\*1\*1 STAT=Y PRED= 6.828 RANGE= 0.148 WIDTH(Y)= 3.107 RESP(Y)= 1.0000 HSQC= C5'  
 2-H2'' /2 7.564362 1\*2\*1 STAT=Y PRED= 7.372 RANGE= 0.153 WIDTH(Y)= 1.762 RESP(Y)= 1.0000 HSQC= C2''  
 2-H3'' /2 6.821859 1\*2\*1 STAT=Y PRED= 6.770 RANGE= 0.148 WIDTH(Y)= 1.054 RESP(Y)= 1.0000 HSQC= C3''  
 2-methyl/2 3.835353 1\*1\*3 STAT=Y PRED= 3.864 RANGE= 0.148 WIDTH(Y)= 0.839 RESP(Y)= 1.0000 HSQC= methyl

3-BDMCRCMN 2\*SPIN= 1 SPECIES=1H POPULATION(Y)= 0.10015

3-H1 /3 7.543196 1\*2\*1 STAT=Y PRED= 7.519 RANGE= 0.513 WIDTH(Y)= 2.339 RESP(Y)= 1.0000 HSQC= C1  
 3-H2 /3 6.686903 1\*2\*1 STAT=Y PRED= 6.631 RANGE= 0.798 WIDTH(Y)= 2.610 RESP(Y)= 1.0000 HSQC= C2  
 3-H4 /3 6.033727 1\*1\*1 STAT=Y PRED= 6.009 RANGE= 0.148 WIDTH(Y)= 1.804 RESP(Y)= 1.0000 HSQC= C4  
 3-H2' /3 7.560945 2\*2\*1 STAT=Y PRED= 7.449 RANGE= 0.163 WIDTH(Y)= 3.084 RESP(Y)= 1.0000 HSQC= C2'  
 3-H3' /3 6.823749 2\*2\*1 STAT=Y PRED= 6.769 RANGE= 0.148 WIDTH(Y)= 2.532 RESP(Y)= 1.0000 HSQC= C3'

COUPLING CONSTANTS(HZ):

J132\_33 15.7886 J 1-H1 1-H2 STAT=Y PRED= 15.690 RANGE= 1.000  
 J115\_31 -0.0037 J 1-H2' 1-H5' STAT=Y PRED= 0.477 RANGE= 1.000  
 J114\_31 2.0568 J 1-H2' 1-H6' STAT=Y PRED= 2.038 RANGE= 1.000  
 J114\_15 8.1027 J 1-H5' 1-H6' STAT=Y PRED= 8.224 RANGE= 1.000  
 J231\_32 15.7922 J 2-H1A 2-H2A STAT=Y PRED= 15.690 RANGE= 1.000  
 J234\_35 15.7996 J 2-H7A 2-H6A STAT=Y PRED= 15.565 RANGE= 1.000  
 J214\_30 2.0000 J 2-H2' 2-H6' STAT=N PRED= 2.000 RANGE= 1.000  
 J215\_30 -0.0966 J 2-H2' 2-H5' STAT=Y PRED= 0.477 RANGE= 1.000  
 J214\_15 7.6821 J 2-H6' 2-H5' STAT=Y PRED= 8.224 RANGE= 1.000  
 J236\_39 0.0033 J 2-H2'' 2-H2'' STAT=Y PRED= 0.409 RANGE= 1.000  
 J237\_36 8.3994 J 2-H3'' 2-H2'' STAT=Y PRED= 8.543 RANGE= 1.000  
 J237\_39 0.8884 J 2-H2'' 2-H3'' STAT=Y PRED= 0.456 RANGE= 1.000  
 J237\_29 -0.0062 J 2-H3'' 2-H3'' STAT=Y PRED= 0.526 RANGE= 1.000  
 J328\_29 15.1524 J 3-H1 3-H2 STAT=Y PRED= 15.565 RANGE= 1.000  
 J327\_14 -0.0005 J 3-H2' 3-H2' STAT=Y PRED= 0.999 RANGE= 1.000  
 J327\_37 7.7306 J 3-H2' 3-H3' STAT=Y PRED= 8.543 RANGE= 1.000  
 J327\_15 0.0022 J 3-H3' 3-H2' STAT=Y PRED= 0.999 RANGE= 1.000  
 J337\_15 -0.0004 J 3-H3' 3-H3' STAT=Y PRED= 0.999 RANGE= 1.000

**Figure S5**  $^1\text{H}$  NMR spectra of DESIGNER fractions with regions of interest (i – vii).

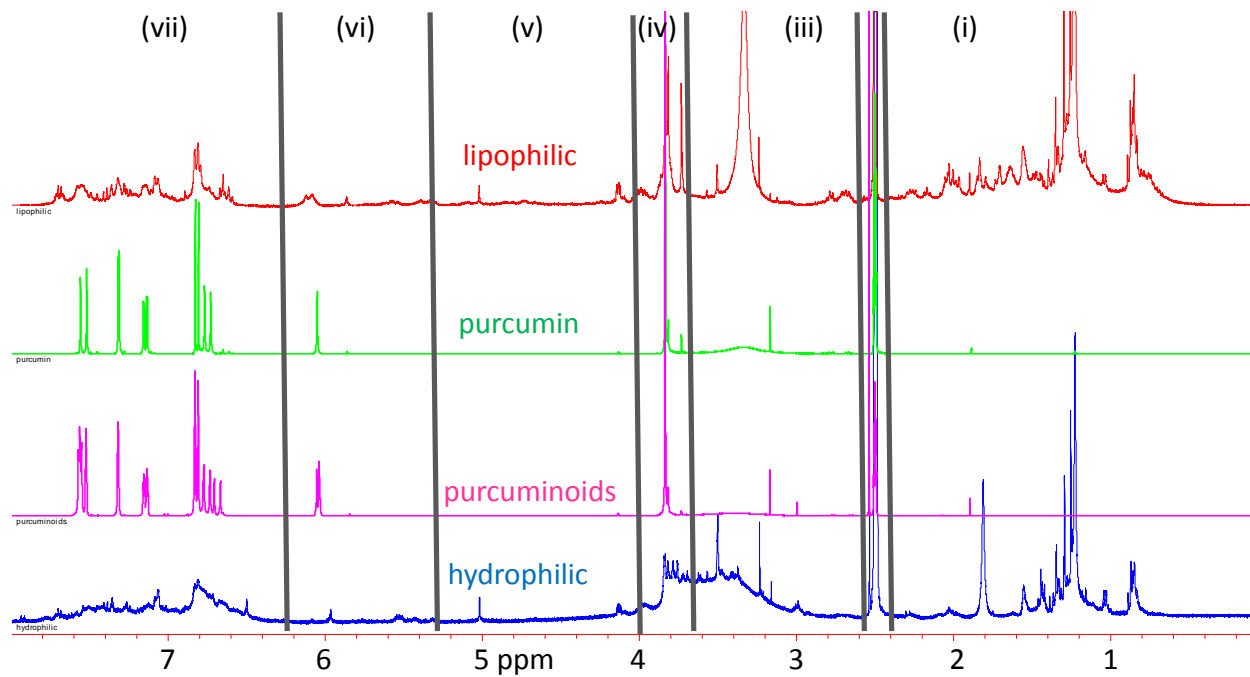

Supplement: NIHMS1039986-supplement-SI.pdf [file NIHMS1039986-supplement-SI.pdf]
